# Supplementary material
Source: HighWire-hosted journal article supplement (doi:10.1101/rna.031567.111)

**Supplemental Material for Exploring Purine N7 Interactions via Atomic Mutagenesis: The Group I Ribozyme as a Case Study**

Marcello Forconi,**°**  Tara Benz-Moy,‡ Kristin Rule Gleitsman,† Eliza Ruben,† Clyde Metz,**°** Daniel Herschlag. †,‡,*****

**°** Department of Chemistry and Biochemistry, College of Charleston, Charleston, South Carolina, USA

‡Department of Chemistry, Stanford University, Stanford, California, USA.

† Department of Biochemistry, Stanford University, Stanford, California, USA.

***** e-mail: herschla@stanford.edu

**SUPPLEMENTAL TABLE 1. Calculated molecular properties of guanosine analogs.**

| **Compound** | **Relative *k*cat/*K*M a** | **Dipole moment (D)b** | **Quadrupole moment, zz component (D•Å)b** | **Polarizabilityb** | **1-Octanol/water partition coefficient (ALOGP)c** |
| --- | --- | --- | --- | --- | --- |
| **G** | (1) | 7.0 | -70.9 | 42.5 | -2.4 |
| **7cG** | 0.08 | 5.2 | -73.4 | 43.1 | -1.5 |
| **7mG** | 1.9 | 3.8 | -74.6 | 48.6 | -2.3 |
| **8n7cG** | 0.9d | 5.8 | -71.0 | 42.1 | -2.3 |

a Relative to G; from Tables 1 and 2.

b From Gaussian calculations using N-9 methylated bases.

c From Virtual Computational Chemistry Laboratory (http://www.vcclab.org/lab/alogps/)

d Assuming that *k*cat/*K*Mof 8-aza-7-deazaguanosine (8n7cG) relative to G is the same as 8-aza-7-deazainosine (8n7cI) relative to I; see text for discussion.

**SUPPLEMENTAL TABLE 2. Assigned metal ions near to N7 atoms in the *Azoarcus* group I ribozyme (PDB ID: 1U6B)**.

| **Metal ion** | **N7 atom (distance in Å)** |
| --- | --- |
| **M1** | None |
| **M2** | None |
| **M3** | A174 (4.6)  G175 (5.1)  G206 (3.7) |
| **M4** | A150 (4.7)  G151 (2.9)  G152 (4.7) |
| **M5** | G125 (5.3) |
| **M6** | A2 (4.9)  G10 (3.9) |
| **M7** | G23 (3.6)  G24 (4.4) |
| **M8** | G53 (4.0)  G54 (4.5) |
| **M9** | None |
| **M10** | G67 (6.1)  G76 (5.8)  G77 (5.8) |
| **M11** | G83 (5.2)  G84 (4.3) |
| **M12** | None |
| **M13** | G38 (5.8)  A39 (4.7) |
| **M14** | A150 (4.7)  G151 (2.9)  G152 (4.7) |
| **M15** | G75 (4.3) |
| **M16** | A127 (5.1)  A172 (5.5) |
| **M17** | G184 (4.8) |
| **M18** | None |

**SUPPLEMENTAL FIGURE 3. Affinity of G and 7mG for the ribozyme as a function of [Mg2+].** Dissociation constants of 7mG (**A**) and G **(B),** and the ratio of these affinities(**C**)**.** Values measured at pH 6.9 are shown as open symbols; values at pH 5.9 as filled symbols.

**(A)**

**(B)**

**(C)**

**
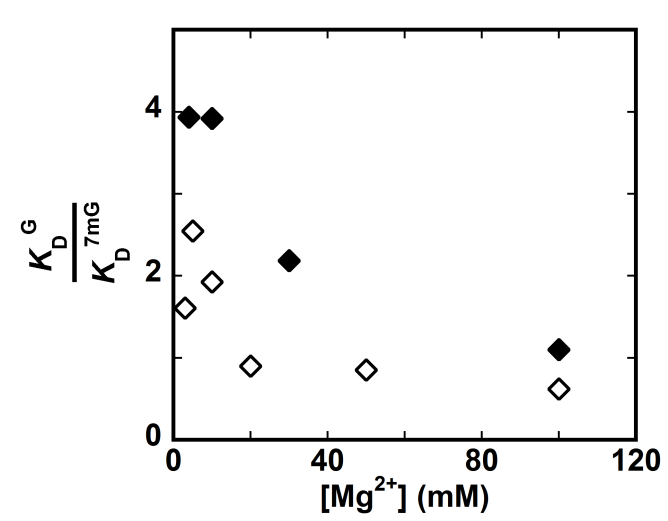

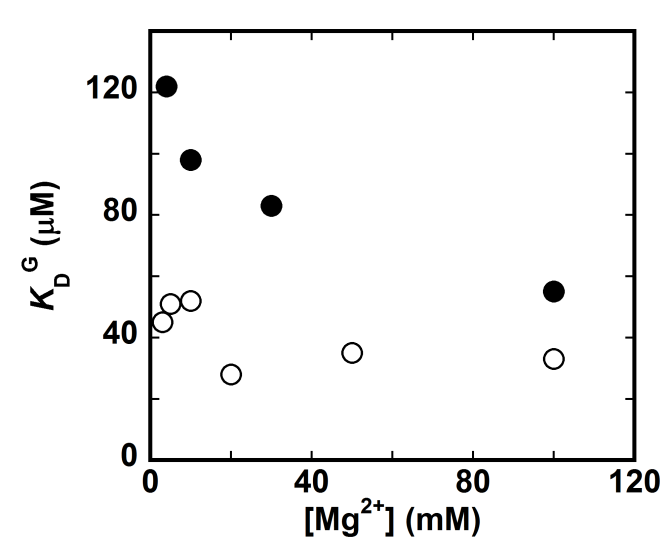

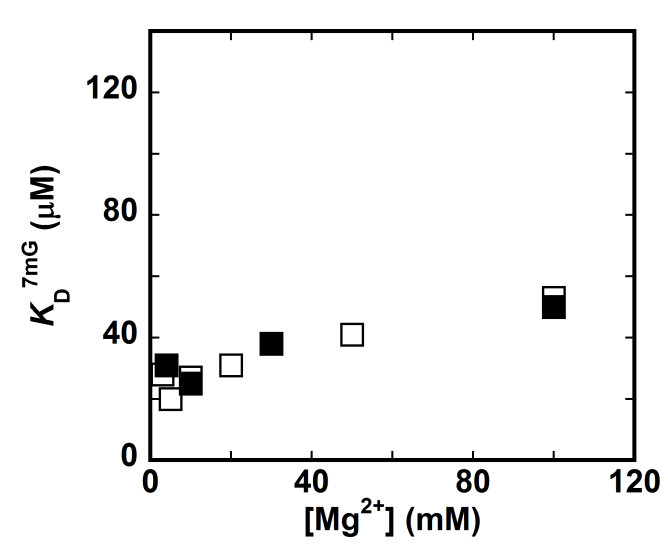
**

**SUPPLEMENTAL FIGURE 2. Total charge density on guanosine analogs.** Calculated total charge density, corresponding to the HOMO molecular orbital, with positive density in red and negative density in blue, for 9-methylguanine and its analogs.9-Methylguanine, which is identical to guanosine except for the methyl group that replaces the ribose ring, was used to simplify the calculations.


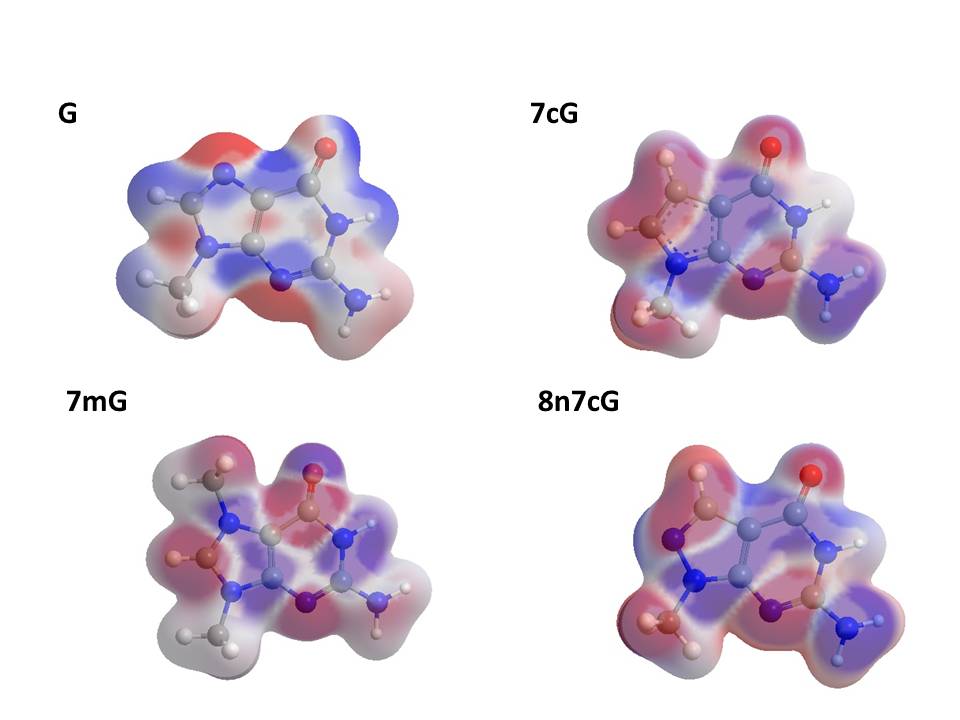


**SUPPLEMENTAL FIGURE 3. Total charge density on inosine analogs.** Calculated total charge density, corresponding to the HOMO molecular orbital, with positive density in red and negative density in blue, for 9-methylhypoxanthine and its analogs.9-Methylhypoxanthine, which is identical to inosine except for the methyl group that replaces the ribose ring, was used to simplify the calculations.


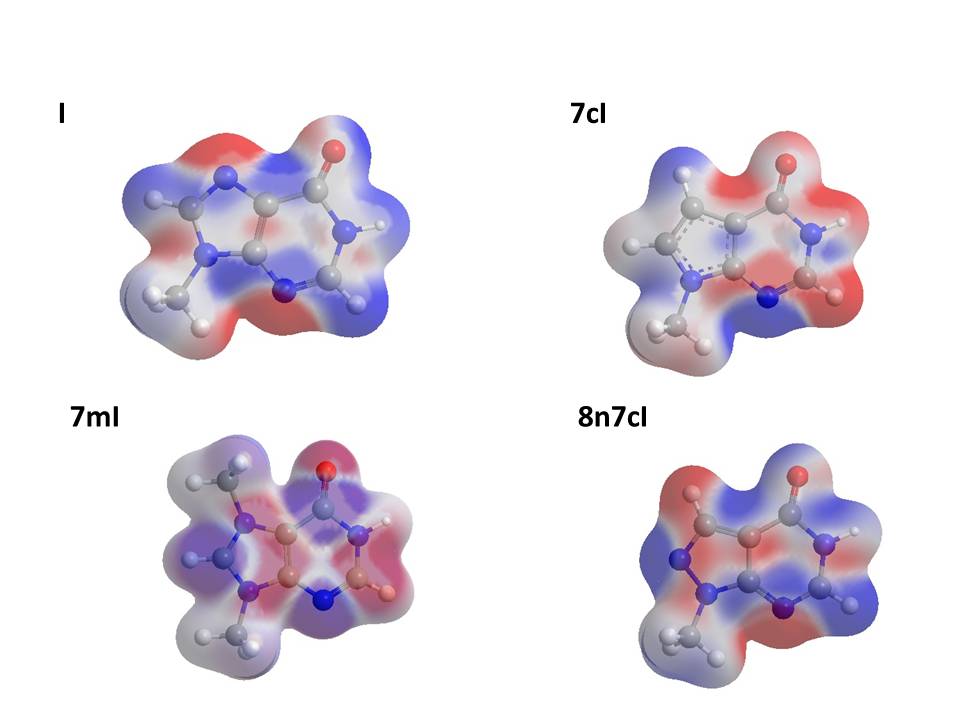

Supplement: SUPPTables_Figures.docx [file SUPPTables_Figures.docx]
